# Supplementary material for: Glycogen and gold nanoparticle bioconjugates: controlled plasmon resonance via glycogen-induced nanoparticle aggregation
Source: Royal Society of Chemistry journal article supplement (doi:10.1039/c3ra40189h), 2013-01-01
Supplement: c3ra40189h.pdf [file c3ra40189h.pdf]

**Supporting information**

**Bioconjugates of glycogen and gold nanoparticles: controlled plasmon resonance via glycogen induced nanoparticle aggregation**

Dušan K. Božanić<sup>a</sup>, Adriaan S. Luyt<sup>b</sup>, Lidija V. Trandafilović<sup>a</sup>, and Vladimir Djoković<sup>a\*</sup>

<sup>a</sup>*Vinča Institute of Nuclear Sciences, University of Belgrade, P.O. Box 522, 11001 Belgrade, Serbia*

<sup>b</sup>*Department of Chemistry, University of Free State, Private Bag X13, Phuthaditjhaba 9866, South Africa*

Corresponding author: [djokovic@vinca.rs](mailto:djokovic@vinca.rs) (V. Djoković)

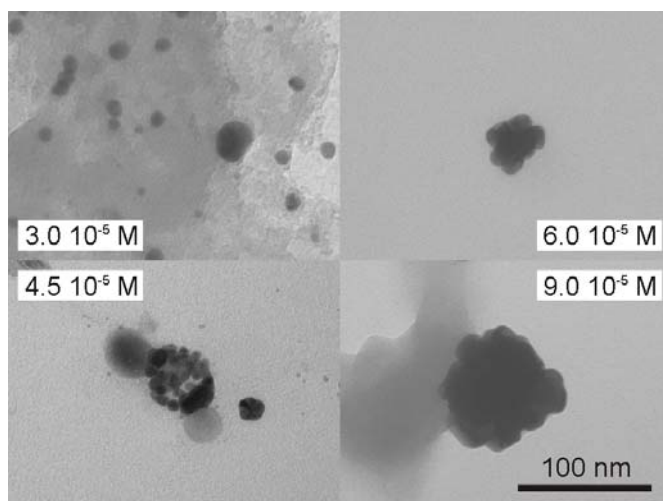

**Figure S1.** TEM images of Au/glycogen samples of different initial gold ion concentrations.

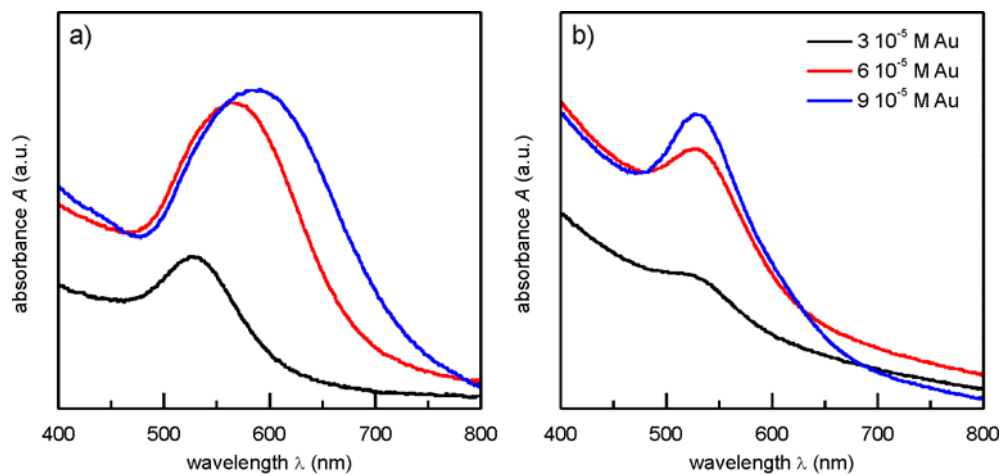

**Figure S2.** Comparison of UV vis absorption spectra of (a) Au/glycogen and (b) Au/starch samples with different initial gold ion concentrations.

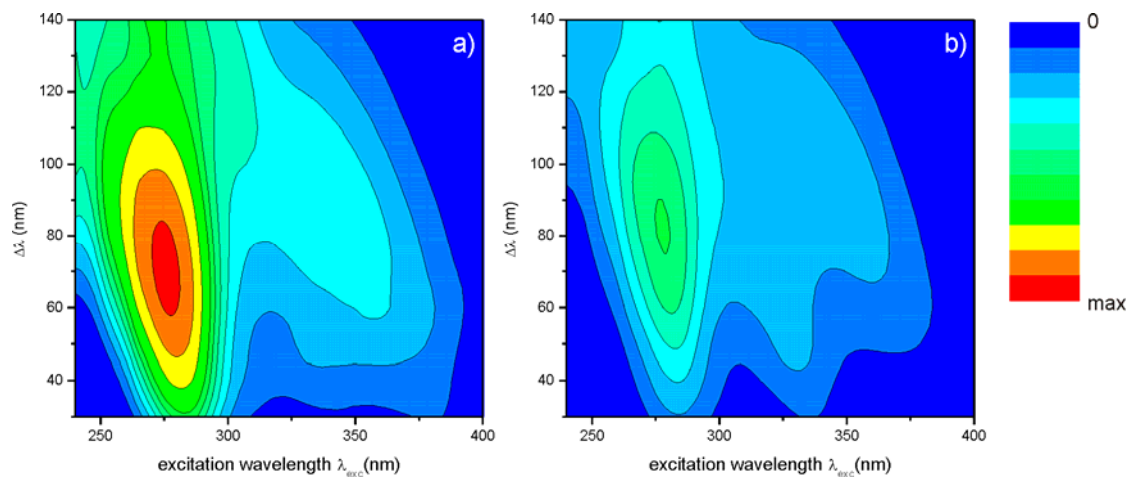

**Figure S3.** Synchronous luminescence spectra of (a) glycogen and (b)  $4.5 \times 10^{-5}$  M Au glycogen solutions.
